# Supplementary figures and images for: LXRs link metabolism to inflammation through Abca1-dependent regulation of membrane composition and TLR signaling
Source: eLife journal article supplement (doi:10.7554/elife.08009), 2015-07-14

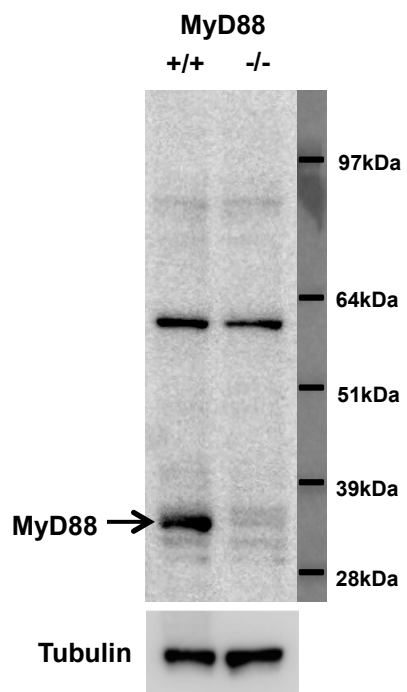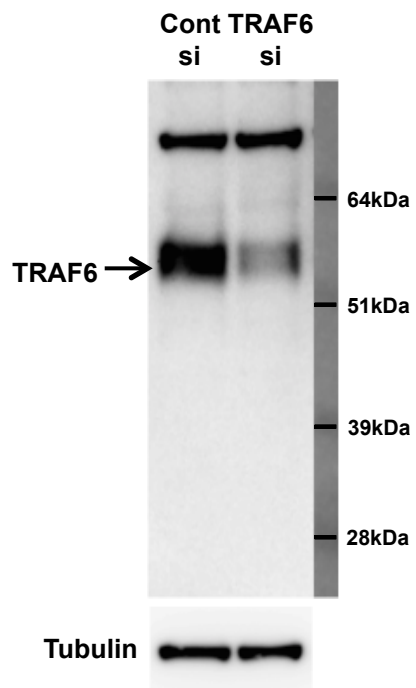

Supplement: supp [file elife_poa_e08009_Figure_11_figure_supplement_1.pdf › elife_poa_e08009_Figure_11_figure_supplement_1.pdf]

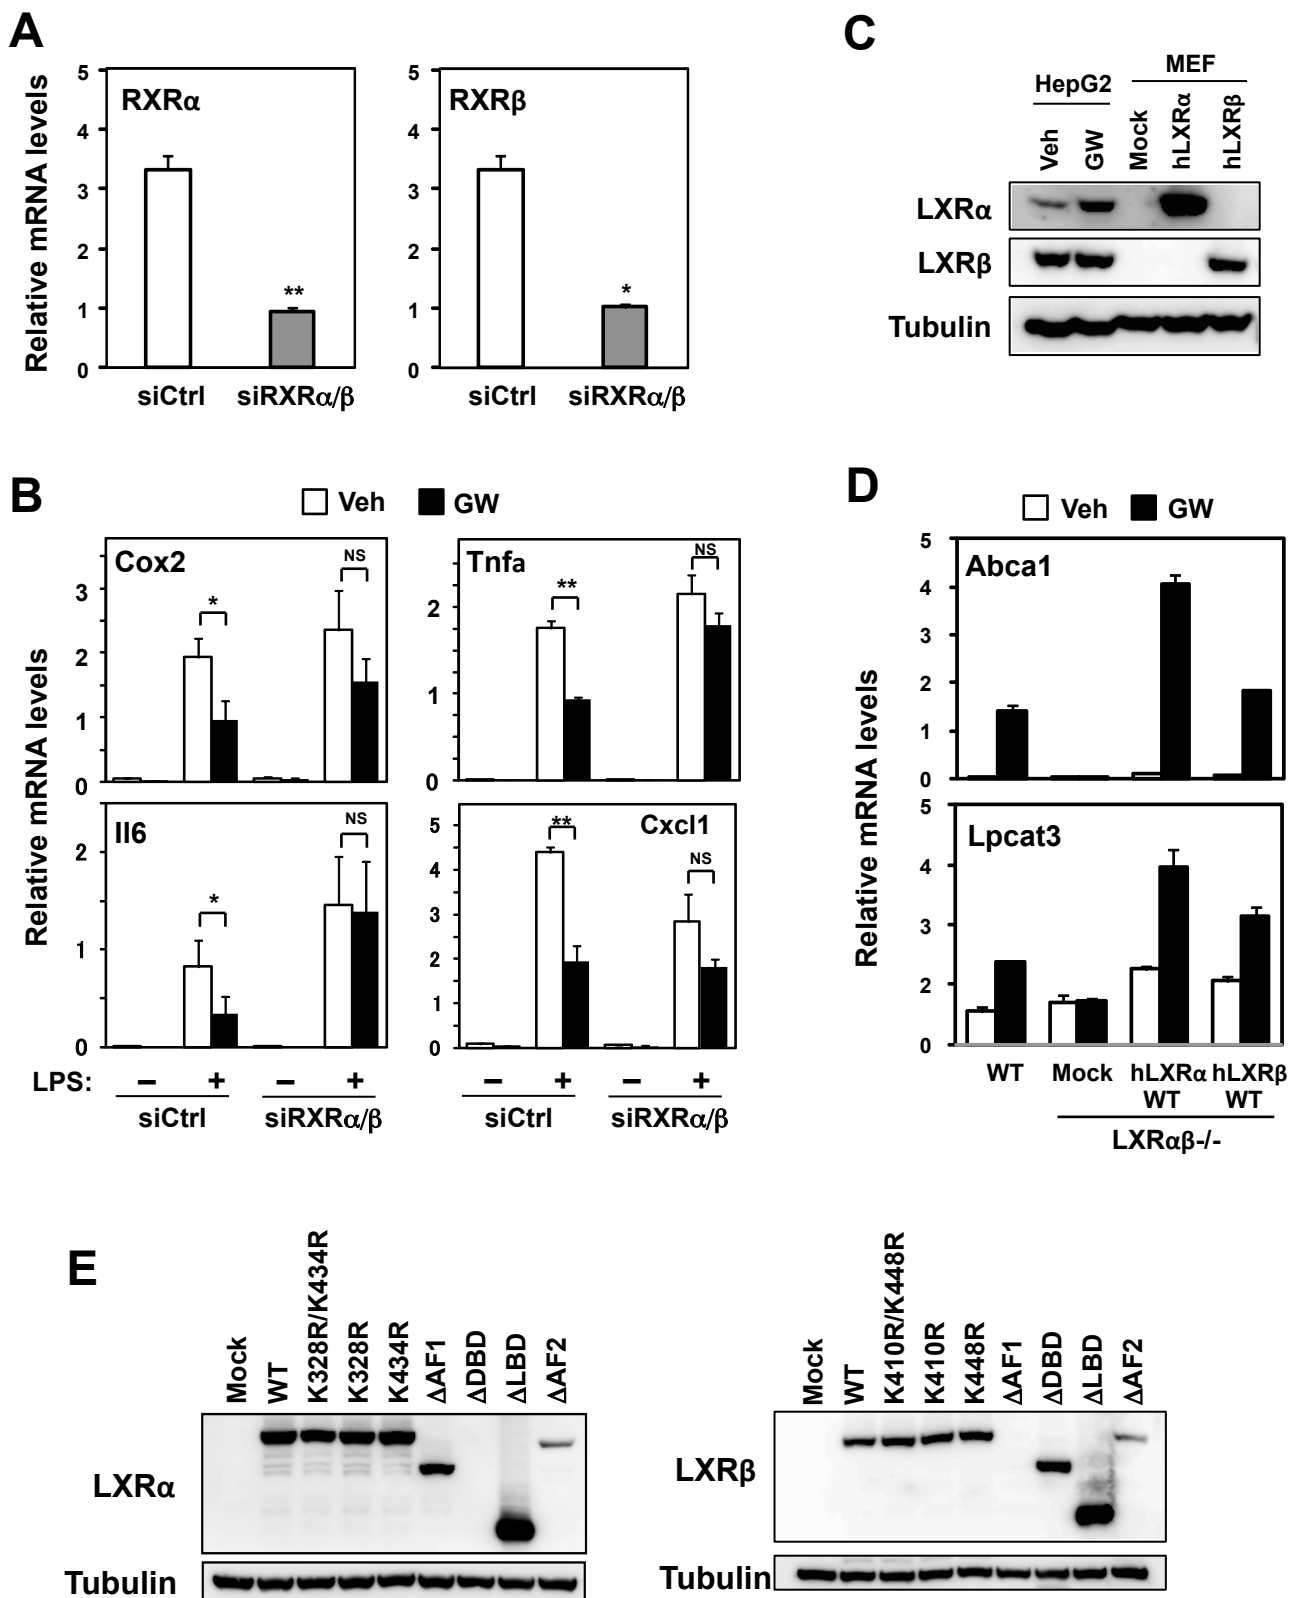

Supplement: supp [file elife_poa_e08009_Figure_1_figure_supplement_1.pdf › elife_poa_e08009_Figure_1_figure_supplement_1.pdf]

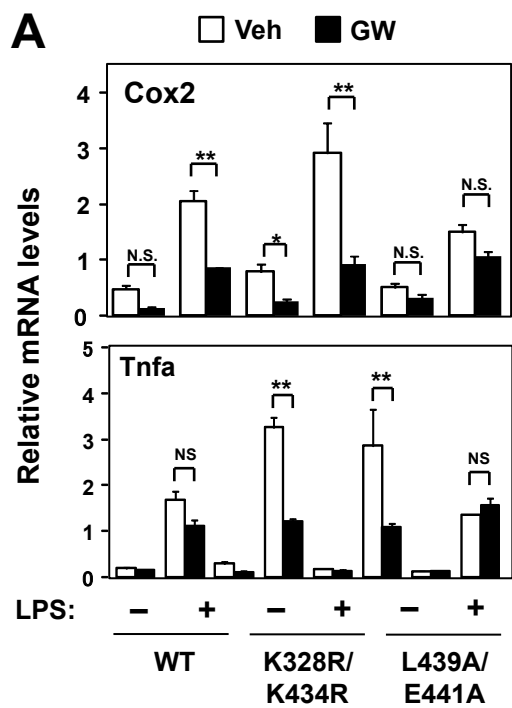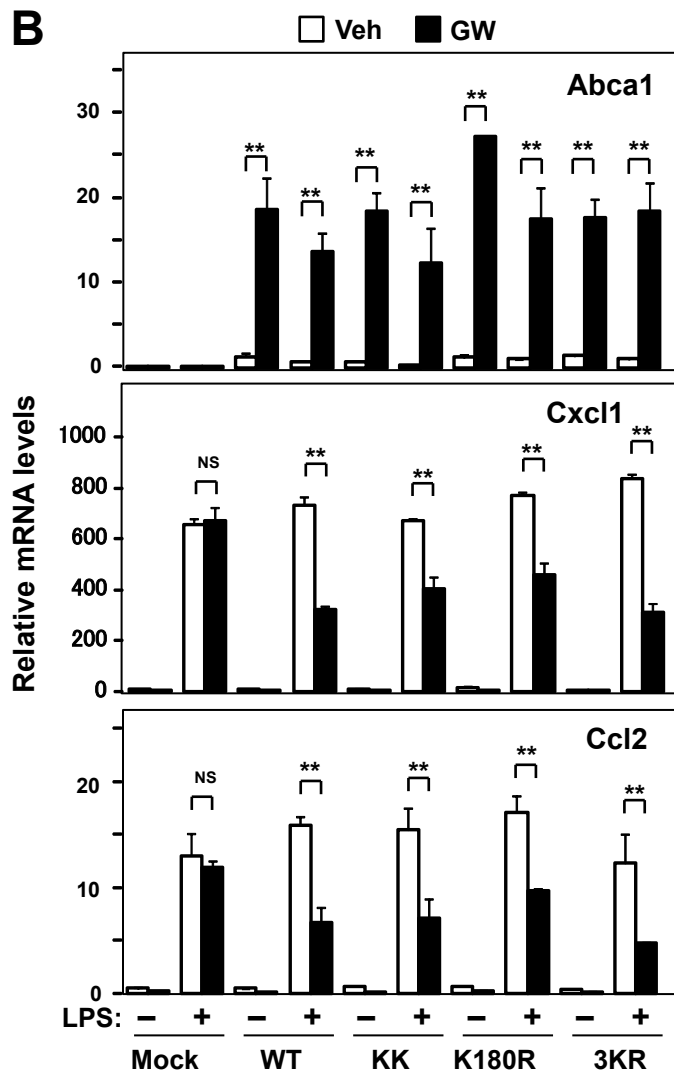

Supplement: supp [file elife_poa_e08009_Figure_2_figure_supplement_1.pdf › elife_poa_e08009_Figure_2_figure_supplement_1.pdf]

**A**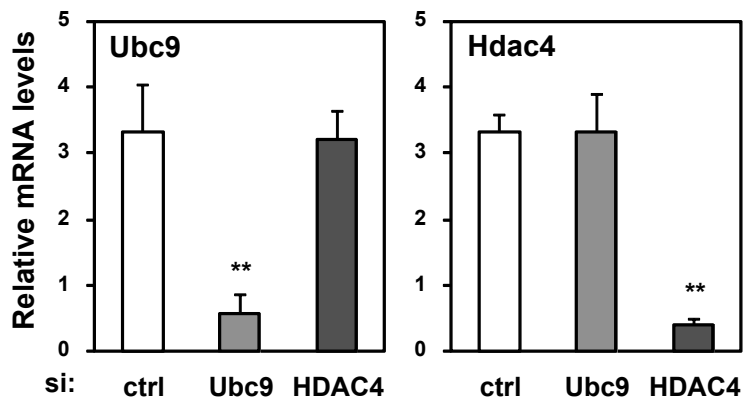**B**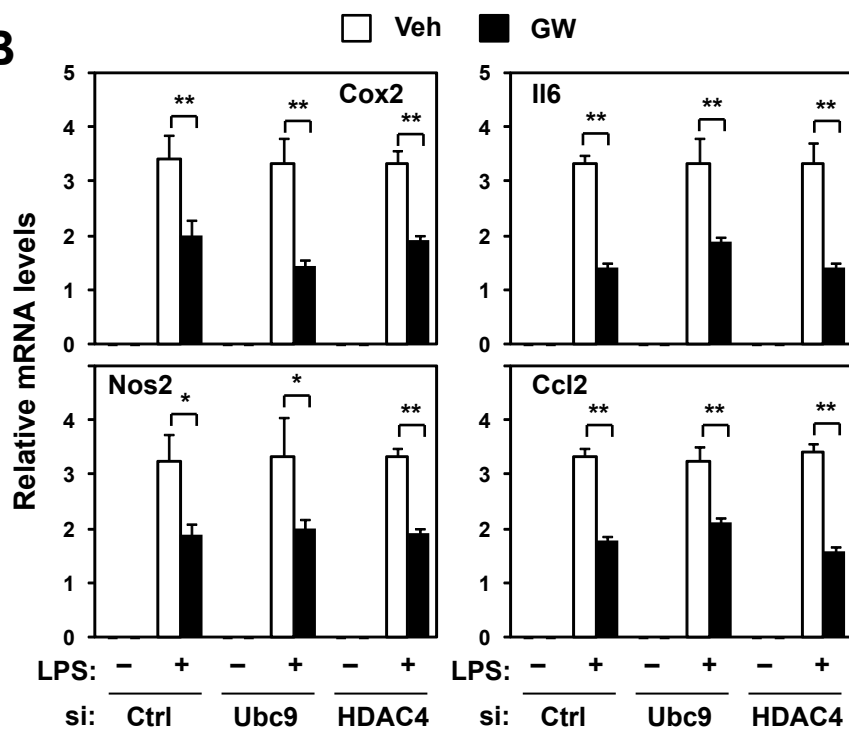

Supplement: supp [file elife_poa_e08009_Figure_2_figure_supplement_2.pdf › elife_poa_e08009_Figure_2_figure_supplement_2.pdf]

**A**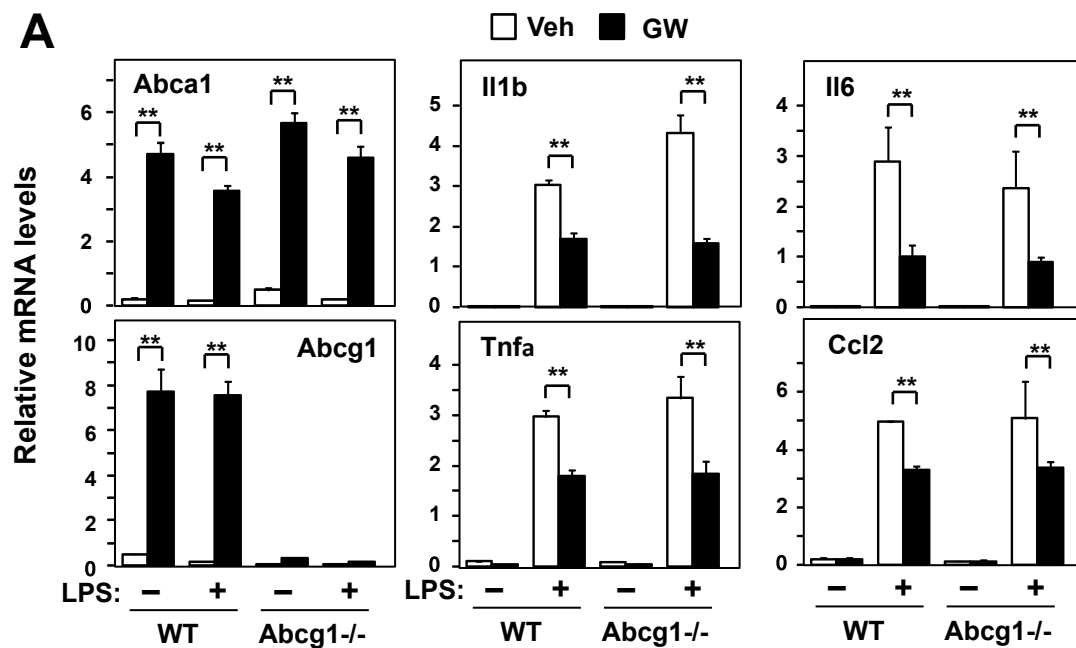**B**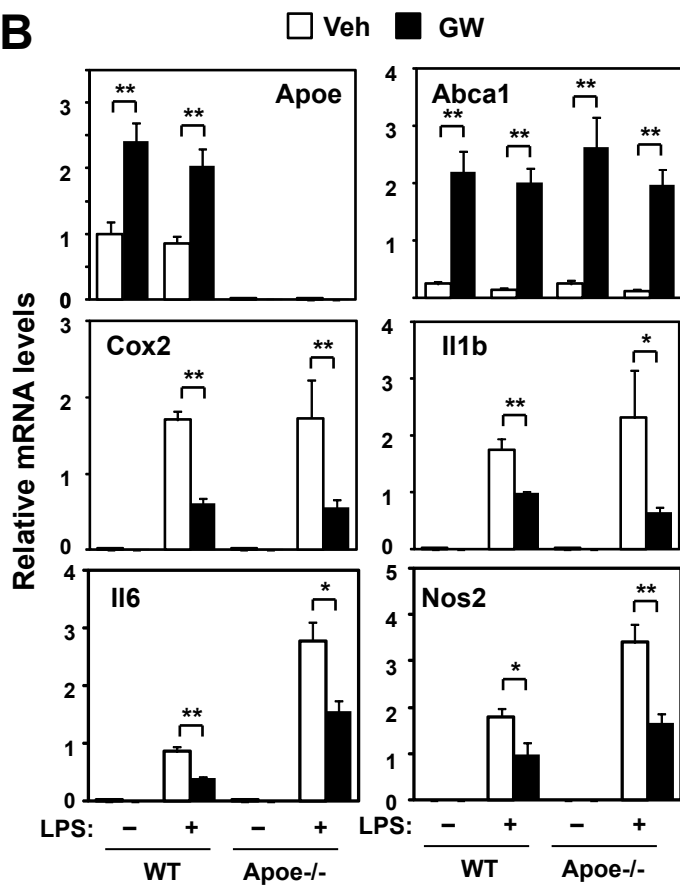**C**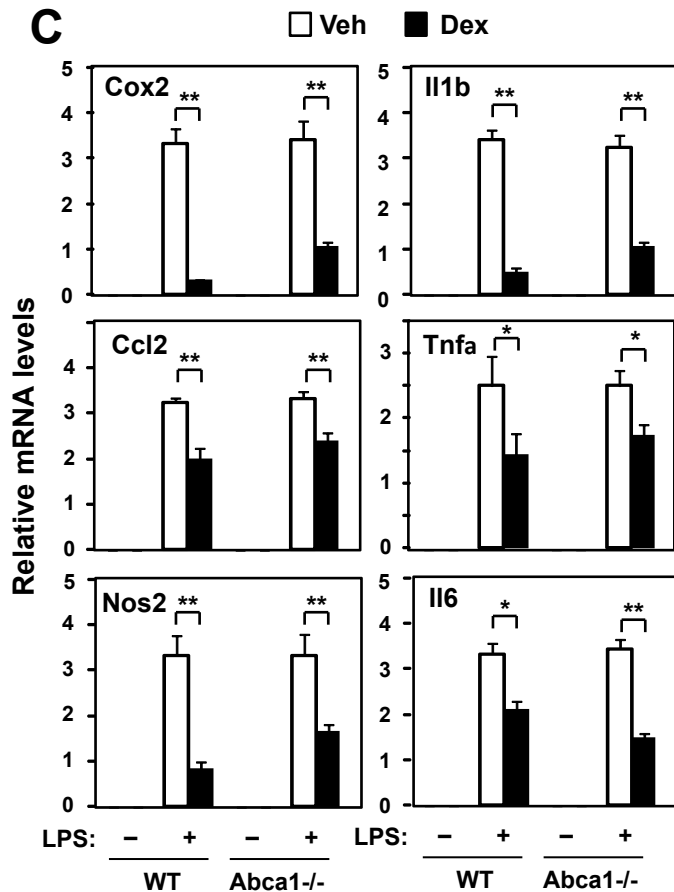

Supplement: supp [file elife_poa_e08009_Figure_3_figure_supplement_1.pdf › elife_poa_e08009_Figure_3_figure_supplement_1.pdf]
